# Supplementary material
Source: MDPI journal article supplement (https://www.mdpi.com/2297-8739/11/1/18)
Supplement: s1 [file s1]

## Supplementary Information

# A Cyanoalkyl Silicone GC Stationary-Phase Polymer as an Extractant for Dispersive Liquid–Liquid Microextraction

Mohamed A. Abdelaziz <sup>1,2</sup> and Neil D. Danielson <sup>1,\*</sup>

<sup>1</sup> Department of Chemistry and Biochemistry, Miami University, Oxford, OH 45056, USA; alima@miamioh.edu

<sup>2</sup> Department of Pharmaceutical Analytical Chemistry, Faculty of Pharmacy, Kafrelsheikh University, Kafrelsheikh 33511, Egypt

\* Correspondence: danielnd@miamioh.edu; Tel.: +1-513-529-2872

### 1. The general DLLME procedure:

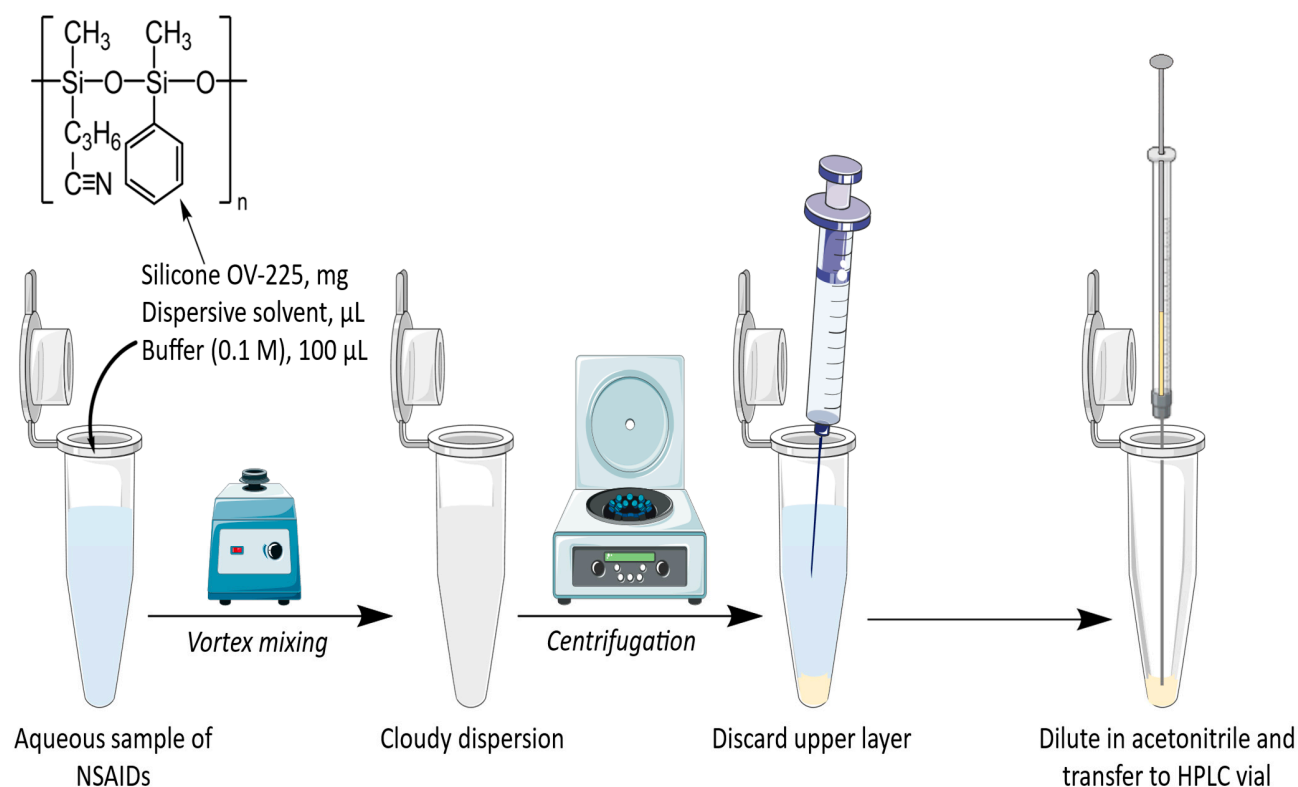

**Figure S1.** A general schematic overview of the dispersive liquid-liquid micro-extraction procedure.

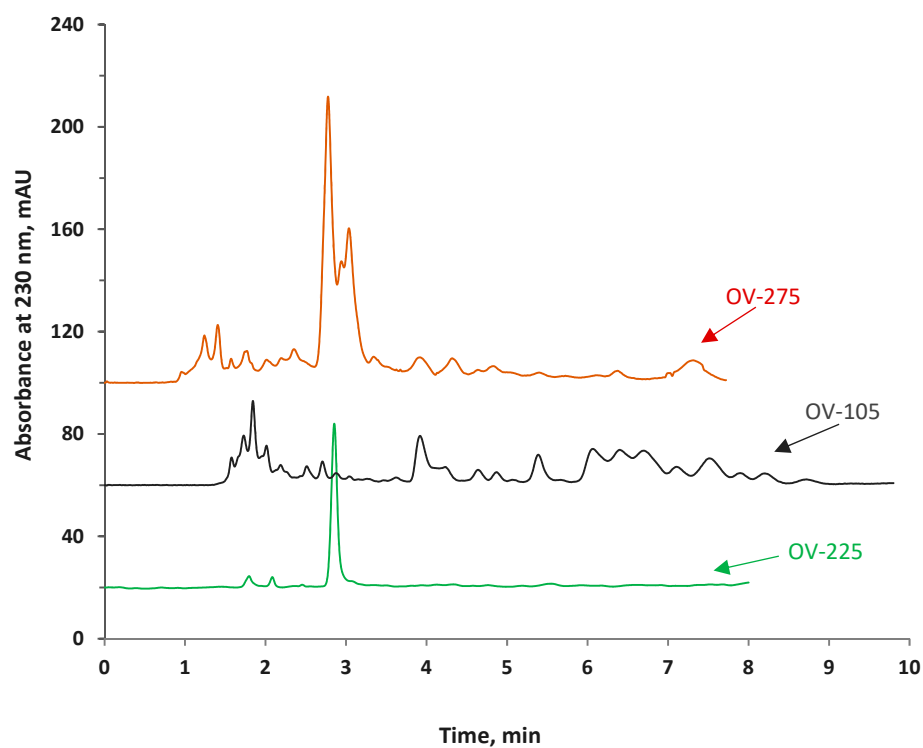

**Figure S2.** Dispersive liquid-liquid micro-extraction of blank ultrapure water samples using the investigated cyanopropyl polysiloxanes: OV-275, OV-105, and OV-225.

## 2. The 2<sup>4</sup> full factorial design:

**Table S1:** The 2<sup>4</sup>-FFD experiment of independent DLLME variables and their corresponding responses.

| Std Order | Run Order | Independent DLLME variables |                                   |     |                      | Responses (Enrichment Factor) |       |       |       |
|-----------|-----------|-----------------------------|-----------------------------------|-----|----------------------|-------------------------------|-------|-------|-------|
|           |           | Extractant mass, mg         | Disperser solvent volume, $\mu$ L | pH  | Extraction time, sec | NAP                           | DIF   | IND   | IBU   |
| 5         | 1         | 20                          | 50                                | 8   | 10                   | 0.16                          | 0.61  | 0.31  | 0.45  |
| 27        | 2         | 20                          | 150                               | 2.2 | 120                  | 10.73                         | 12.60 | 13.80 | 13.69 |
| 9         | 3         | 20                          | 50                                | 2.2 | 120                  | 9.69                          | 13.60 | 11.89 | 10.49 |
| 11        | 4         | 20                          | 150                               | 2.2 | 120                  | *                             | *     | *     | *     |
| 12        | 5         | 50                          | 150                               | 2.2 | 120                  | 9.22                          | 11.45 | 10.55 | 10.28 |
| 1         | 6         | 20                          | 50                                | 2.2 | 10                   | 9.82                          | 13.74 | 12.32 | 10.90 |
| 8         | 7         | 50                          | 150                               | 8   | 10                   | 0.06                          | 0.11  | 0.37  | 0.46  |
| 25        | 8         | 20                          | 50                                | 2.2 | 120                  | *                             | *     | *     | *     |
| 6         | 9         | 50                          | 50                                | 8   | 10                   | 0.22                          | 0.20  | 0.48  | 0.28  |
| 2         | 10        | 50                          | 50                                | 2.2 | 10                   | 5.68                          | 8.24  | 7.88  | 7.52  |
| 22        | 11        | 50                          | 50                                | 8   | 10                   | 0.22                          | 0.16  | 0.49  | 0.33  |
| 4         | 12        | 50                          | 150                               | 2.2 | 10                   | 7.02                          | 9.70  | 8.79  | 8.37  |
| 13        | 13        | 20                          | 50                                | 8   | 120                  | 0.06                          | 0.21  | 0.03  | 0.73  |
| 19        | 14        | 20                          | 150                               | 2.2 | 10                   | 9.33                          | 14.31 | 11.60 | 10.67 |
| 29        | 15        | 20                          | 50                                | 8   | 120                  | 0.02                          | 0.22  | 0.03  | 0.73  |
| 24        | 16        | 50                          | 150                               | 8   | 10                   | 0.02                          | 0.05  | 0.44  | 0.36  |
| 28        | 17        | 50                          | 150                               | 2.2 | 120                  | 8.98                          | 10.90 | 10.06 | 9.92  |
| 16        | 18        | 50                          | 150                               | 8   | 120                  | 0.10                          | 0.11  | 0.42  | 0.53  |
| 7         | 19        | 20                          | 150                               | 8   | 10                   | 0.00                          | 0.01  | 0.10  | 0.07  |
| 23        | 20        | 20                          | 150                               | 8   | 10                   | 0.09                          | 0.23  | 0.21  | 0.29  |
| 20        | 21        | 50                          | 150                               | 2.2 | 10                   | 7.44                          | 9.94  | 9.17  | 8.91  |
| 17        | 22        | 20                          | 50                                | 2.2 | 10                   | *                             | *     | *     | *     |
| 15        | 23        | 20                          | 150                               | 8   | 120                  | 0.24                          | 0.20  | 0.38  | 0.33  |
| 32        | 24        | 50                          | 150                               | 8   | 120                  | 0.08                          | 0.17  | 0.21  | 0.42  |
| 10        | 25        | 50                          | 50                                | 2.2 | 120                  | 8.45                          | 10.10 | 10.05 | 10.23 |
| 3         | 26        | 20                          | 150                               | 2.2 | 10                   | 8.25                          | 12.54 | 10.44 | 9.46  |
| 14        | 27        | 50                          | 50                                | 8   | 120                  | 0.17                          | 0.14  | 0.55  | 0.30  |
| 31        | 28        | 20                          | 150                               | 8   | 120                  | 0.24                          | 0.22  | 0.34  | 0.44  |
| 18        | 29        | 50                          | 50                                | 2.2 | 10                   | 4.49                          | 6.65  | 6.47  | 6.32  |
| 30        | 30        | 50                          | 50                                | 8   | 120                  | 0.15                          | 0.13  | 0.28  | 0.17  |
| 21        | 31        | 20                          | 50                                | 8   | 10                   | 0.16                          | 0.61  | 0.31  | 0.45  |
| 26        | 32        | 50                          | 50                                | 2.2 | 120                  | 10.54                         | 11.01 | 10.41 | 9.44  |

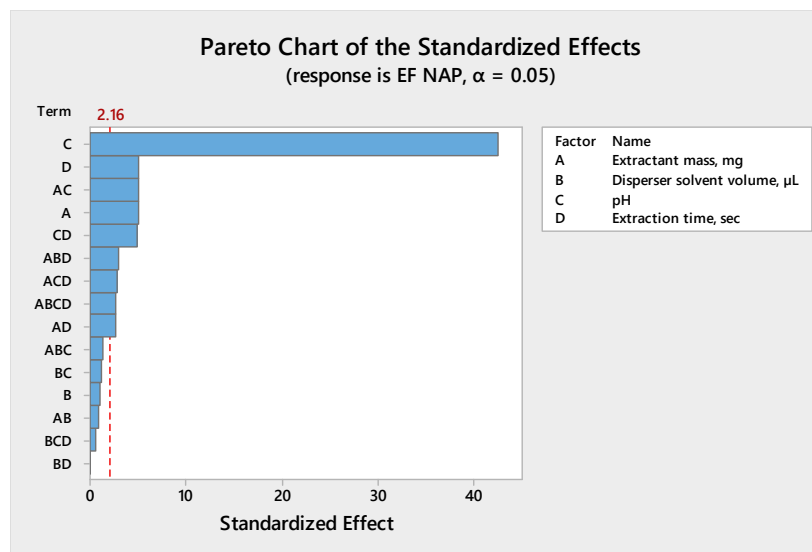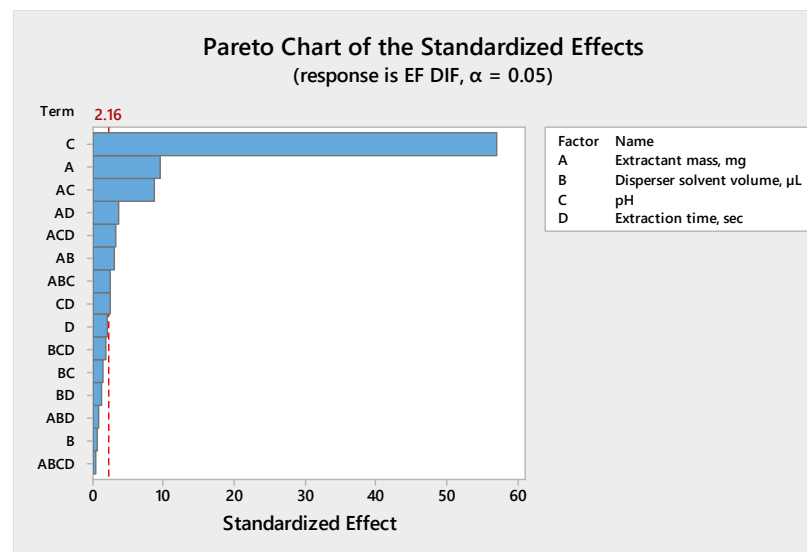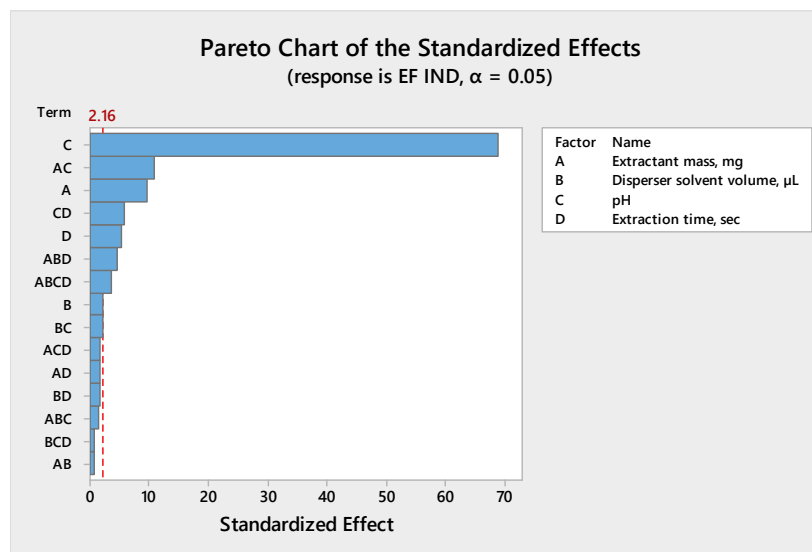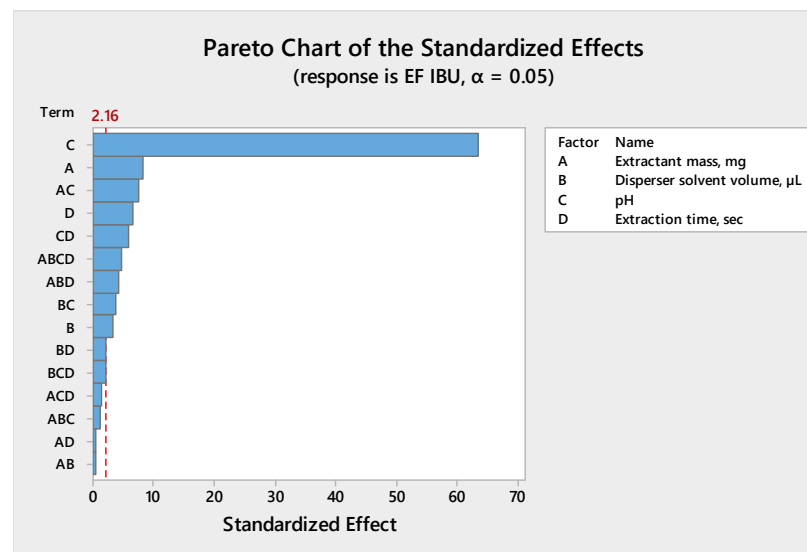

**Figure S3:** Pareto charts from the  $2^4$ -FFD showing the main and interaction effects of the investigated experimental variables on the preconcentration of the studied NSAIDs. The dotted red line represents Bonferroni's statistical limit of significance.

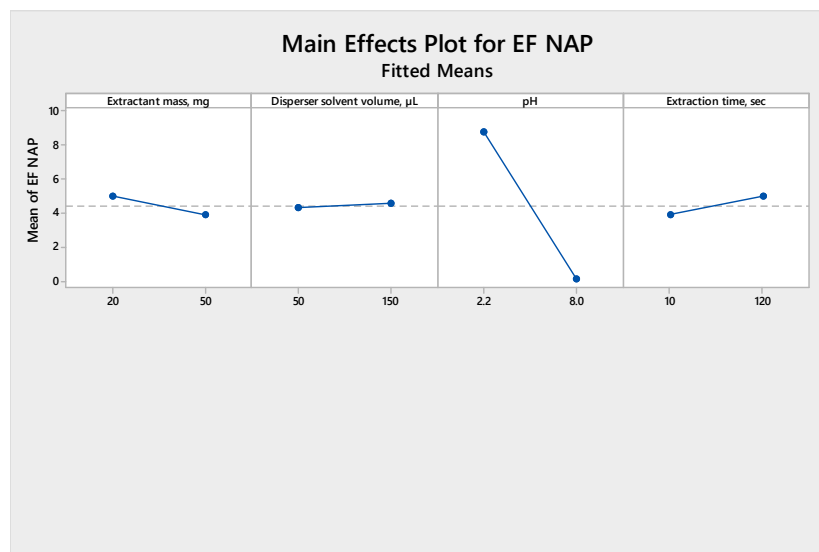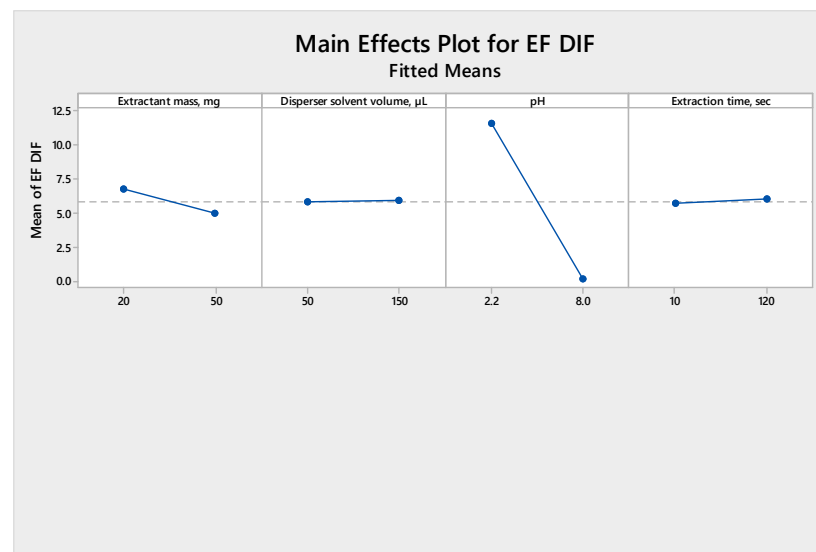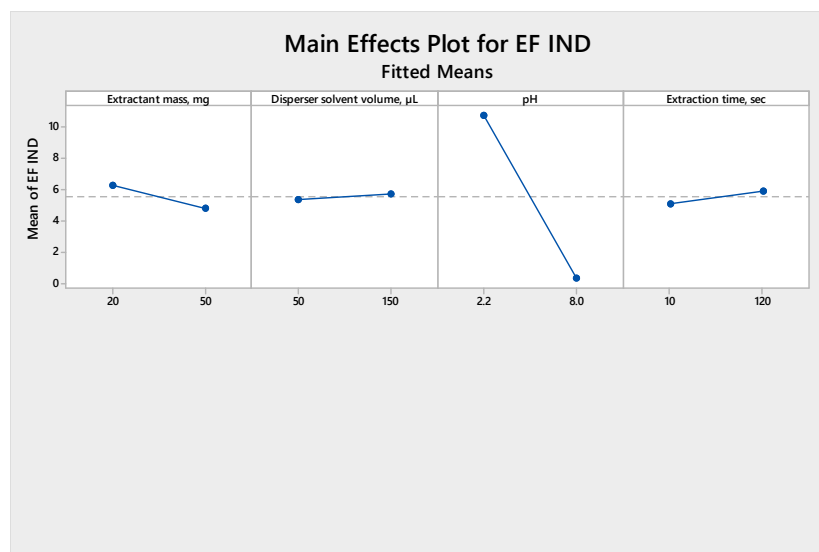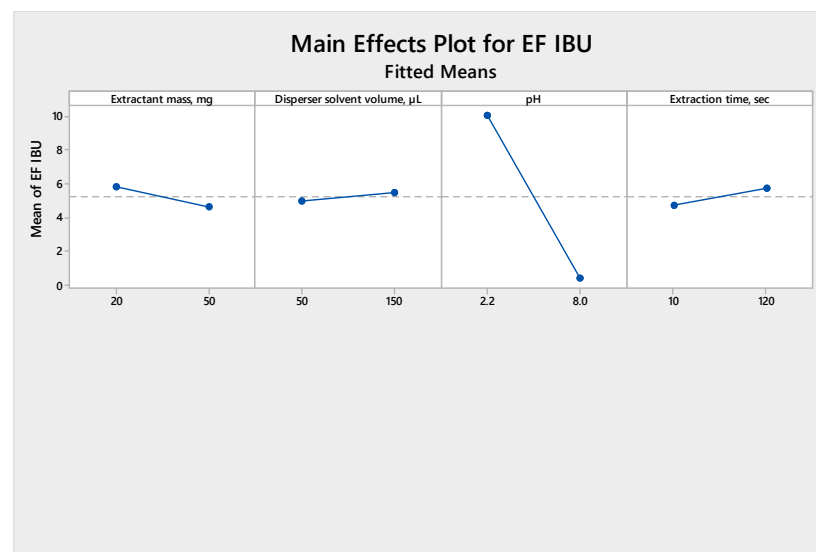

**Figure S4:** Main effects plots from the  $2^4$ -FFD showing the main effects of the investigated experimental variables on the pre-concentration of the studied NSAIDs.

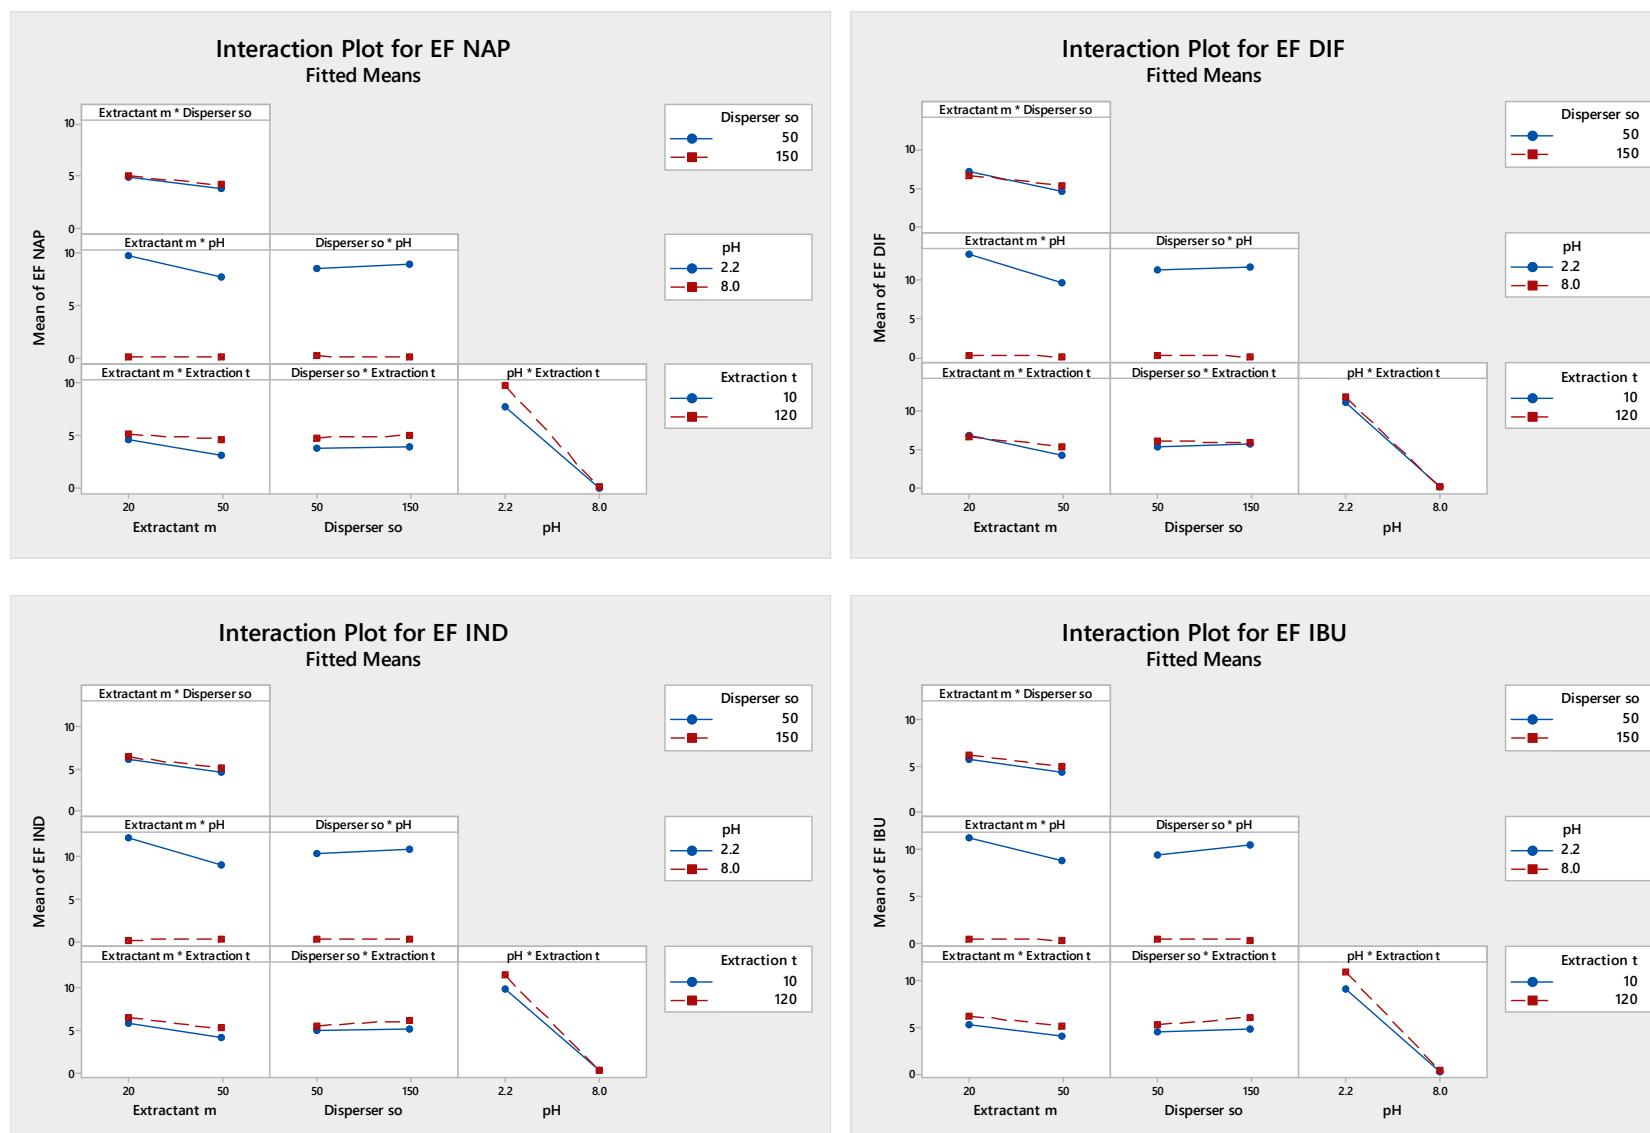

**Figure S5:** Interaction plots from the  $2^4$ -FFD showing the interaction effects of the investigated experimental variables on the pre-concentration of the studied NSAIDs.

### 3. The Face-centered central composite design:

**Table S2:** The FCCD experiment of independent DLLME variables and their corresponding responses.

| Run Order | Pt. Type |                            | Blocks | Independent DLLME variables |     |                       | Responses (Enrichment Factor) |        |        |        |
|-----------|----------|----------------------------|--------|-----------------------------|-----|-----------------------|-------------------------------|--------|--------|--------|
|           |          |                            |        | Extractant mass (mg)        | pH  | Extraction time (sec) | NAP                           | DIF    | IND    | IBU    |
| 1         | 1        | Cube points                | 1      | 10                          | 2.2 | 60                    | 21.026                        | 29.46  | 31.457 | 27.179 |
| 2         | 1        |                            | 1      | 30                          | 3.4 | 60                    | 16.392                        | 18.243 | 22.556 | 19.625 |
| 3         | 1        |                            | 1      | 30                          | 2.2 | 180                   | 20.922                        | 24.835 | 25.984 | 23.661 |
| 4         | 1        |                            | 1      | 10                          | 3.4 | 180                   | 26.889                        | 29.856 | 38.279 | 34.204 |
| 5         | 0        | Center points in cube      | 1      | 20                          | 2.8 | 120                   | 25.608                        | 30.611 | 32.511 | 30.261 |
| 6         | 0        |                            | 1      | 20                          | 2.8 | 120                   | 23.229                        | 26.941 | 30.347 | 27.465 |
| 7         | 1        | Cube points                | 2      | 30                          | 2.2 | 60                    | 20.317                        | 23.625 | 23.401 | 22.838 |
| 8         | 1        |                            | 2      | 10                          | 3.4 | 60                    | 18.72                         | 17.621 | 29.157 | 26.15  |
| 9         | 1        |                            | 2      | 10                          | 2.2 | 180                   | 24.894                        | 34.084 | 34.724 | 31.713 |
| 10        | 1        |                            | 2      | 30                          | 3.4 | 180                   | 16.467                        | 16.402 | 18.503 | 18.177 |
| 11        | 0        | Center points in cube      | 2      | 20                          | 2.8 | 120                   | 22.889                        | 27.087 | 30.114 | 27.122 |
| 12        | 0        |                            | 2      | 20                          | 2.8 | 120                   | 22.531                        | 20.867 | 29.621 | 27.336 |
| 13        | -1       | Axial points, $\alpha = 1$ | 3      | 10                          | 2.8 | 120                   | 21.907                        | 27.026 | 32.29  | 26.301 |
| 14        | -1       |                            | 3      | 30                          | 2.8 | 120                   | 14.972                        | 15.891 | 18.875 | 17.003 |
| 15        | -1       |                            | 3      | 20                          | 2.2 | 120                   | 17.999                        | 21.573 | 22.945 | 20.841 |
| 16        | -1       |                            | 3      | 20                          | 3.4 | 120                   | 18.099                        | 18.902 | 23.063 | 20.963 |
| 17        | -1       | Axial points, $\alpha = 1$ | 3      | 20                          | 2.8 | 60                    | 22.99                         | 27.795 | 31.654 | 27.796 |
| 18        | -1       |                            | 3      | 20                          | 2.8 | 180                   | *                             | *      | *      | *      |
| 19        | 1        | Cube points                | 1      | 10                          | 2.2 | 60                    | 27.774                        | 37.334 | 38.698 | 34.006 |
| 20        | 1        |                            | 1      | 30                          | 3.4 | 60                    | 18.592                        | 20.313 | 24.554 | 21.798 |
| 21        | 1        |                            | 1      | 30                          | 2.2 | 180                   | 20.784                        | 24.567 | 25.617 | 23.308 |
| 22        | 1        |                            | 1      | 10                          | 3.4 | 180                   | 27.517                        | 29.666 | 36.854 | 33.744 |
| 23        | 0        | Center points in cube      | 1      | 20                          | 2.8 | 120                   | 22.328                        | 29.01  | 30.818 | 27.122 |
| 24        | 0        |                            | 1      | 20                          | 2.8 | 120                   | 25.175                        | 30.347 | 33.615 | 29.982 |
| 25        | 1        | Cube points                | 2      | 30                          | 2.2 | 60                    | 17.125                        | 22.392 | 22.852 | 20.113 |
| 26        | 1        |                            | 2      | 10                          | 3.4 | 60                    | 23.598                        | 25.299 | 34.497 | 30.313 |
| 27        | 1        |                            | 2      | 10                          | 2.2 | 180                   | 24.471                        | 32.998 | 34.811 | 30.563 |
| 28        | 1        |                            | 2      | 30                          | 3.4 | 180                   | 16.314                        | 16.721 | 20.682 | 18.843 |
| 29        | 0        | Center points in cube      | 2      | 20                          | 2.8 | 120                   | 23.962                        | 28.016 | 30.202 | 28.284 |
| 30        | 0        |                            | 2      | 20                          | 2.8 | 120                   | 22.758                        | 27.286 | 29.59  | 27.344 |
| 31        | -1       | Axial points, $\alpha = 1$ | 3      | 10                          | 2.8 | 120                   | 26.41                         | 31.874 | 37.415 | 32.55  |
| 32        | -1       |                            | 3      | 30                          | 2.8 | 120                   | 17.129                        | 18.477 | 20.473 | 18.849 |
| 33        | -1       |                            | 3      | 20                          | 2.2 | 120                   | 19.73                         | 23.815 | 24.975 | 22.606 |
| 34        | -1       |                            | 3      | 20                          | 3.4 | 120                   | 18.618                        | 19.419 | 23.087 | 21.144 |
| 35        | -1       | Axial points, $\alpha = 1$ | 3      | 20                          | 2.8 | 60                    | 22.609                        | 25.669 | 29.532 | 26.322 |
| 36        | -1       |                            | 3      | 20                          | 2.8 | 180                   | 20.985                        | 23.55  | 25.974 | 23.752 |

**Table S3:** Mathematical model fitting for each response.

| Response            | <i>p</i> -value (lack-of-fit) | $R^2_{adj}$ |
|---------------------|-------------------------------|-------------|
| EF <sub>(IND)</sub> | 0.140                         | 0.8640      |
| EF <sub>(IBU)</sub> | 0.363                         | 0.8365      |
| EF <sub>(NAP)</sub> | 0.420                         | 0.7177      |
| EF <sub>(DIF)</sub> | 0.309                         | 0.7689      |

#### 4. The salting-out effect on enrichment factors:

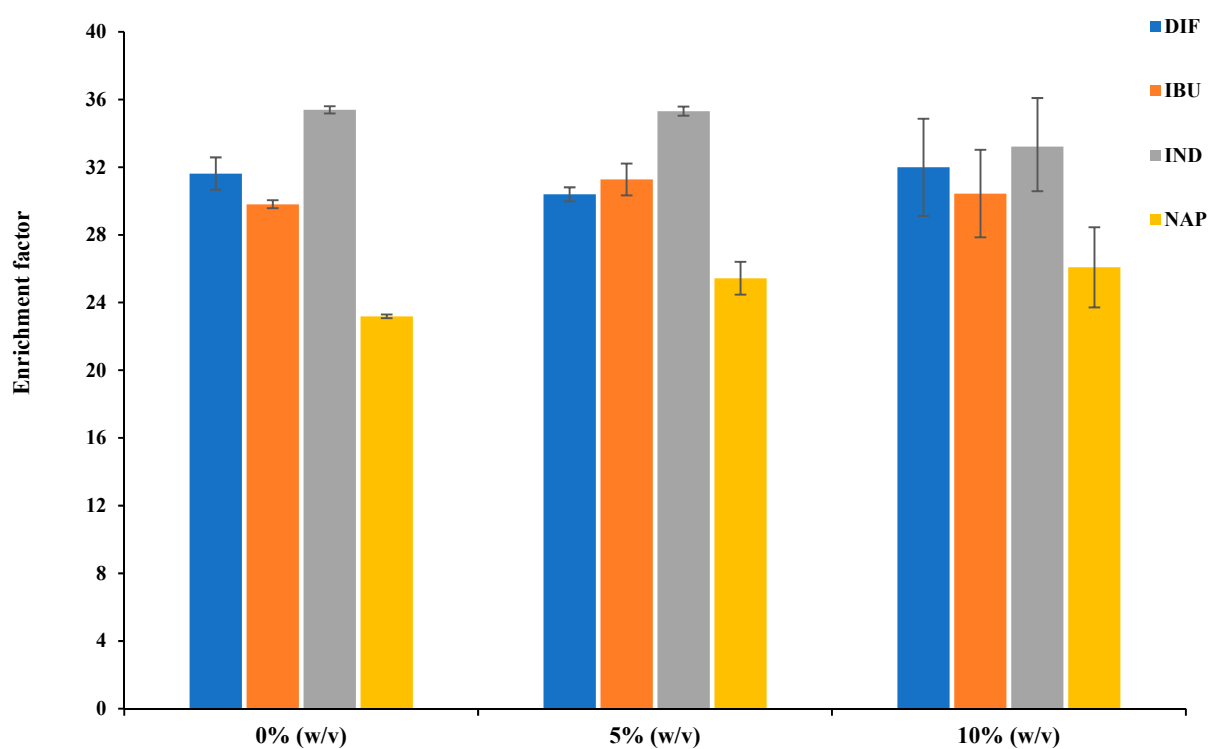

**Figure S6.** Salting-out effect on enrichment factors of the studied analytes. Note: the *x*-axis is the NaCl concentration in the sample solution before extraction. *n*=2.



**Table S4:** Comparison with other reported liquid chromatographic methods.

SPE: solid-phase extraction; MISPE: molecularly imprinted SPE; MSPE: magnetic SPE; IL-DLLME: ionic liquid dispersive liquid-liquid microextraction; FLD: fluorescence detection; LOQ: limit of quantitation; RSD: relative standard deviation. NAP: naproxen sodium; DIF: diflunisal; IBU: ibuprofen; IND: indomethacin.

| Extraction method      | Instrument  | Matrix                     | Sample volume (mL) | Extraction time (min) | Analyte                                     | LOQ (ng/mL)       | RSD (%) | Reference |
|------------------------|-------------|----------------------------|--------------------|-----------------------|---------------------------------------------|-------------------|---------|-----------|
| SPE                    | HPLC-UV     | Water, urine               | -                  | 10                    | Aspirin, naproxen,                          | <1.3              | <3.5    | [14]      |
| MISPE                  | HPLC-UV     | Tap water                  | 10.0               | 30                    | ibuprofen                                   | 75                | -       | [15]      |
| MISPE                  | HPLC-UV     | River water                | 50.0               | 160                   | Naproxen, ibuprofen, diclofenac             | 0.5 (NAP)<br>3.33 | <10.3   | [16]      |
| MSPE                   | HPLC/UV     | Tap, river, and wastewater | 10.0               | Extraction 2.4;       | Naproxen, diclofenac, mefenamic             | 2.9 (NAP)         | <3.8    | [17]      |
| MSPE                   | UHPLC-MS/MS | Lake water, wastewater     | 50.0               | Extraction 45.0;      | Naproxen, meloxicam, carprofen, diclofenac, | 0.3 (NAP)         | 7.2     | [18]      |
| IL-DLLME               | LC-MS/MS    | Wastewater                 | 10.0               | 5                     | Naproxen, ibuprofen, ketoprofen             | 0.142 (NAP)       | <10     | [19]      |
| IL-DLLME               | HPLC/UV/FLD | Tap and river water        | 5.0                | 0.5                   | ibuprofen, diclofenac, ketoprofen           | 137 (IBU)         | <2      | [20]      |
| (OV-225 polymer)-DLLME | HPLC-UV     | Tap water                  | 1.5                | 3                     | Naproxen                                    | 5.0               | 0.7     | This work |
|                        |             |                            |                    |                       | Diflunisal                                  | 10.0              | 6.7     |           |
|                        |             |                            |                    |                       | Indomethacin                                | 25.0              | 0.4     |           |
|                        |             |                            |                    |                       | Ibuprofen                                   | 75                | 1.9     |           |

## Bibliometric Analysis Search Key

### Chlorinated hydrocarbons

|    | Solvent            | Search key                                                                                                                                                                                                                                                                                                                          | Results |
|----|--------------------|-------------------------------------------------------------------------------------------------------------------------------------------------------------------------------------------------------------------------------------------------------------------------------------------------------------------------------------|---------|
| 1. | Trichloromethane   | (( TITLE-ABS-KEY ( "dispersive liquid-liquid microextraction" ) OR TITLE-ABS-KEY ( dllme ) ) AND ( ABS ( chloroform ) OR ABS ( trichloromethane ) ) AND ABS ( extract* ) AND NOT TITLE-ABS-KEY ( "ionic liquid" ) AND NOT TITLE-ABS-KEY ( eutectic ) ) AND ( LIMIT-TO ( DOCTYPE , "ar" ) )                                          | 294     |
| 2. | Tetrachloromethane | (( TITLE-ABS-KEY ( "dispersive liquid-liquid microextraction" ) OR TITLE-ABS-KEY ( dllme ) ) AND ( ABS ( "carbon tetrachloride" ) OR ABS ( tetrachloromethane ) ) AND ABS ( extract* ) AND NOT TITLE-ABS-KEY ( "ionic liquid" ) AND NOT TITLE-ABS-KEY ( eutectic ) ) AND ( LIMIT-TO ( DOCTYPE , "ar" ) )                            | 183     |
| 3. | Dichloromethane    | (( TITLE-ABS-KEY ( "dispersive liquid-liquid microextraction" ) OR TITLE-ABS-KEY ( dllme ) ) AND ( ABS ( "methylene chloride" ) OR ABS ( dichloromethane ) ) AND ABS ( extract* ) AND NOT TITLE-ABS-KEY ( "ionic liquid" ) AND NOT TITLE-ABS-KEY ( eutectic ) ) AND ( LIMIT-TO ( DOCTYPE , "ar" ) )                                 | 78      |
| 4. | Tetrachloroethane  | (( TITLE-ABS-KEY ( "dispersive liquid-liquid microextraction" ) OR TITLE-ABS-KEY ( dllme ) ) AND ( ABS ( "ethylene tetrachloride" ) OR ABS ( tetrachloroethane ) ) AND ABS ( extract* ) AND NOT TITLE-ABS-KEY ( "ionic liquid" ) AND NOT TITLE-ABS-KEY ( eutectic ) ) AND ( LIMIT-TO ( DOCTYPE , "ar" ) )                           | 32      |
| 5. | Tetrachloroethene  | (( TITLE-ABS-KEY ( "dispersive liquid-liquid microextraction" ) OR TITLE-ABS-KEY ( dllme ) ) AND ( ABS ( "tetrachloroethylene" ) OR ABS ( tetrachloroethene ) OR ABS ( perchloroethylene ) ) AND ABS ( extract* ) AND NOT TITLE-ABS-KEY ( "ionic liquid" ) AND NOT TITLE-ABS-KEY ( eutectic ) ) AND ( LIMIT-TO ( DOCTYPE , "ar" ) ) | 23      |
| 6. | Dichloroethane     | (( TITLE-ABS-KEY ( "dispersive liquid-liquid microextraction" ) OR TITLE-ABS-KEY ( dllme ) ) AND ( ABS ( "ethylene dichloride" ) OR ABS ( dichloroethane ) ) AND ABS ( extract* ) AND NOT TITLE-ABS-KEY ( "ionic liquid" ) AND NOT TITLE-ABS-KEY ( eutectic ) ) AND ( LIMIT-TO ( DOCTYPE , "ar" ) )                                 | 18      |
| 7. | Trichloroethane    | (( TITLE-ABS-KEY ( "dispersive liquid-liquid microextraction" ) OR TITLE-ABS-KEY ( dllme ) ) AND ( ABS ( "ethylene trichloride" ) OR ABS ( trichloroethane ) ) AND ABS ( extract* ) AND NOT TITLE-ABS-KEY ( "ionic liquid" ) AND NOT TITLE-ABS-KEY ( eutectic ) ) AND ( LIMIT-TO ( DOCTYPE , "ar" ) )                               | 25      |
| 8. | Trichloroethene    | (( TITLE-ABS-KEY ( "dispersive liquid-liquid microextraction" ) OR TITLE-ABS-KEY ( dllme ) ) AND ( ABS ( "trichloroethylene" ) OR ABS ( trichloroethene ) ) AND ABS ( extract* ) AND NOT                                                                                                                                            | 15      |

|     |                                    |                                                                                                                                                                                                                                                                                                                             |    |
|-----|------------------------------------|-----------------------------------------------------------------------------------------------------------------------------------------------------------------------------------------------------------------------------------------------------------------------------------------------------------------------------|----|
|     |                                    | TITLE-ABS-KEY ( "ionic liquid" ) AND NOT TITLE-ABS-KEY ( eutectic ) ) AND ( LIMIT-TO ( DOCTYPE , "ar" ) )                                                                                                                                                                                                                   |    |
| 9.  | Dichloroethene                     | (( TITLE-ABS-KEY ( "dispersive liquid-liquid microextraction" ) OR TITLE-ABS-KEY ( dllme ) ) AND ( ABS ( "dichloroethylene" ) OR ABS ( dichloroethene ) ) AND ABS ( extract* ) AND NOT TITLE-ABS-KEY ( "ionic liquid" ) AND NOT TITLE-ABS-KEY ( eutectic ) ) AND ( LIMIT-TO ( DOCTYPE , "ar" ) )                            | 2  |
| 10. | Chlorobenzene and dichlorobenzenes | (( TITLE-ABS-KEY ( "dispersive liquid-liquid microextraction" ) OR TITLE-ABS-KEY ( dllme ) ) AND ( ABS ( "chlorobenzene" ) OR ABS ( monochlorobenzene ) OR ABS ( dichlorobenzene ) ) AND ABS ( extract* ) AND NOT TITLE-ABS-KEY ( "ionic liquid" ) AND NOT TITLE-ABS-KEY ( eutectic ) ) AND ( LIMIT-TO ( DOCTYPE , "ar" ) ) | 78 |

## Alkanes

|    | Solvent     | Search key                                                                                                                                                                                                                                            | Results |
|----|-------------|-------------------------------------------------------------------------------------------------------------------------------------------------------------------------------------------------------------------------------------------------------|---------|
| 1. | Pentane     | (( TITLE-ABS-KEY ( "dispersive liquid-liquid microextraction" ) OR TITLE-ABS-KEY ( dllme ) ) AND ABS ( "pentane" W/8 extract* ) ) AND NOT TITLE-ABS-KEY ( "ionic liquid" ) AND NOT TITLE-ABS-KEY ( eutectic ) AND ( LIMIT-TO ( DOCTYPE , "ar" ) )     | 2       |
| 2. | Hexane      | (( TITLE-ABS-KEY ( "dispersive liquid-liquid microextraction" ) OR TITLE-ABS-KEY ( dllme ) ) AND ABS ( "hexane" W/8 extract* ) ) AND NOT TITLE-ABS-KEY ( "ionic liquid" ) AND NOT TITLE-ABS-KEY ( eutectic ) AND ( LIMIT-TO ( DOCTYPE , "ar" ) )      | 25      |
| 3. | Heptane     | (( TITLE-ABS-KEY ( "dispersive liquid-liquid microextraction" ) OR TITLE-ABS-KEY ( dllme ) ) AND ABS ( "heptane" W/8 extract* ) ) AND NOT TITLE-ABS-KEY ( "ionic liquid" ) AND NOT TITLE-ABS-KEY ( eutectic ) AND ( LIMIT-TO ( DOCTYPE , "ar" ) )     | 4       |
| 4. | Octane      | (( TITLE-ABS-KEY ( "dispersive liquid-liquid microextraction" ) OR TITLE-ABS-KEY ( dllme ) ) AND ABS ( "octane" W/8 extract* ) ) AND NOT TITLE-ABS-KEY ( "ionic liquid" ) AND NOT TITLE-ABS-KEY ( eutectic ) AND ( LIMIT-TO ( DOCTYPE , "ar" ) )      | 4       |
| 5. | Isooctane   | (( TITLE-ABS-KEY ( "dispersive liquid-liquid microextraction" ) OR TITLE-ABS-KEY ( dllme ) ) AND ABS ( "isooctane" W/8 extract* ) ) AND NOT TITLE-ABS-KEY ( "ionic liquid" ) AND NOT TITLE-ABS-KEY ( eutectic ) AND ( LIMIT-TO ( DOCTYPE , "ar" ) )   | 2       |
| 6. | Dodecane    | (( TITLE-ABS-KEY ( "dispersive liquid-liquid microextraction" ) OR TITLE-ABS-KEY ( dllme ) ) AND ABS ( "dodecane" W/8 extract* ) ) AND NOT TITLE-ABS-KEY ( "ionic liquid" ) AND NOT TITLE-ABS-KEY ( eutectic ) AND ( LIMIT-TO ( DOCTYPE , "ar" ) )    | 5       |
| 7. | Hexadecane  | (( TITLE-ABS-KEY ( "dispersive liquid-liquid microextraction" ) OR TITLE-ABS-KEY ( dllme ) ) AND ABS ( "hexadecane" W/8 extract* ) ) AND NOT TITLE-ABS-KEY ( "ionic liquid" ) AND NOT TITLE-ABS-KEY ( eutectic ) AND ( LIMIT-TO ( DOCTYPE , "ar" ) )  | 6       |
| 8. | cyclohexane | (( TITLE-ABS-KEY ( "dispersive liquid-liquid microextraction" ) OR TITLE-ABS-KEY ( dllme ) ) AND ABS ( "cyclohexane" W/8 extract* ) ) AND NOT TITLE-ABS-KEY ( "ionic liquid" ) AND NOT TITLE-ABS-KEY ( eutectic ) AND ( LIMIT-TO ( DOCTYPE , "ar" ) ) | 6       |

### Alcohols

|    | Solvent                                                    | Search key                                                                                                                                                                                                                                         | Results |
|----|------------------------------------------------------------|----------------------------------------------------------------------------------------------------------------------------------------------------------------------------------------------------------------------------------------------------|---------|
| 1. | Hexanol including 2-ethyl-1-hexanol and 5-methyl-1-hexanol | (( TITLE-ABS-KEY ( "dispersive liquid-liquid microextraction" ) OR TITLE-ABS-KEY ( dllme ) ) AND ABS ( hexanol W/10 extract* ) ) AND NOT TITLE-ABS-KEY ( "ionic liquid" ) AND NOT TITLE-ABS-KEY ( eutectic ) AND ( LIMIT-TO ( DOCTYPE , "ar" ) )   | 9       |
| 2. | Heptanol                                                   | (( TITLE-ABS-KEY ( "dispersive liquid-liquid microextraction" ) OR TITLE-ABS-KEY ( dllme ) ) AND ABS ( heptanol W/10 extract* ) ) AND NOT TITLE-ABS-KEY ( "ionic liquid" ) AND NOT TITLE-ABS-KEY ( eutectic ) AND ( LIMIT-TO ( DOCTYPE , "ar" ) )  | 7       |
| 3. | Octanol                                                    | (( TITLE-ABS-KEY ( "dispersive liquid-liquid microextraction" ) OR TITLE-ABS-KEY ( dllme ) ) AND ABS ( octanol W/10 extract* ) ) AND NOT TITLE-ABS-KEY ( "ionic liquid" ) AND NOT TITLE-ABS-KEY ( eutectic ) AND ( LIMIT-TO ( DOCTYPE , "ar" ) )   | 67      |
| 4. | Nonanol                                                    | (( TITLE-ABS-KEY ( "dispersive liquid-liquid microextraction" ) OR TITLE-ABS-KEY ( dllme ) ) AND ABS ( nonanol W/10 extract* ) ) AND NOT TITLE-ABS-KEY ( "ionic liquid" ) AND NOT TITLE-ABS-KEY ( eutectic ) AND ( LIMIT-TO ( DOCTYPE , "ar" ) )   | 2       |
| 5. | Decanol                                                    | (( TITLE-ABS-KEY ( "dispersive liquid-liquid microextraction" ) OR TITLE-ABS-KEY ( dllme ) ) AND ABS ( decanol W/10 extract* ) ) AND NOT TITLE-ABS-KEY ( "ionic liquid" ) AND NOT TITLE-ABS-KEY ( eutectic ) AND ( LIMIT-TO ( DOCTYPE , "ar" ) )   | 9       |
| 6. | Undecanol                                                  | (( TITLE-ABS-KEY ( "dispersive liquid-liquid microextraction" ) OR TITLE-ABS-KEY ( dllme ) ) AND ABS ( undecanol W/10 extract* ) ) AND NOT TITLE-ABS-KEY ( "ionic liquid" ) AND NOT TITLE-ABS-KEY ( eutectic ) AND ( LIMIT-TO ( DOCTYPE , "ar" ) ) | 80      |
| 7. | Dodecanol                                                  | (( TITLE-ABS-KEY ( "dispersive liquid-liquid microextraction" ) OR TITLE-ABS-KEY ( dllme ) ) AND ABS ( dodecanol W/10 extract* ) ) AND NOT TITLE-ABS-KEY ( "ionic liquid" ) AND NOT TITLE-ABS-KEY ( eutectic ) AND ( LIMIT-TO ( DOCTYPE , "ar" ) ) | 58      |

### Other Solvents

|    | Solvent                | Search key                                                                                                                                                                                                                                                                                                                                                                    | Results |
|----|------------------------|-------------------------------------------------------------------------------------------------------------------------------------------------------------------------------------------------------------------------------------------------------------------------------------------------------------------------------------------------------------------------------|---------|
| 1. | Ionic liquids          | ( ( TITLE-ABS-KEY ( "dispersive liquid-liquid microextraction" ) OR TITLE-ABS-KEY ( dllme ) ) AND ABS ( "ionic liquid" ) AND ABS ( extract* ) AND NOT TITLE-ABS-KEY ( eutectic ) ) AND ( LIMIT-TO ( DOCTYPE , "ar" ) )                                                                                                                                                        | 455     |
| 2. | Deep eutectic solvents | ( ( TITLE-ABS-KEY ( "dispersive liquid-liquid microextraction" ) OR TITLE-ABS-KEY ( dllme ) ) AND ABS ( "deep eutectic" ) AND ABS ( extract* ) ) AND ( LIMIT-TO ( DOCTYPE , "ar" ) )                                                                                                                                                                                          | 213     |
| 3. | Acetates               | ( ( TITLE-ABS-KEY ( "dispersive liquid-liquid microextraction" ) OR TITLE-ABS-KEY ( dllme ) ) AND ABS ( "acetate" ) AND ABS ( extract* ) ) AND NOT TITLE-ABS-KEY ( "ionic liquid" ) AND NOT TITLE-ABS-KEY ( eutectic ) AND ( LIMIT-TO ( DOCTYPE , "ar" ) )                                                                                                                    | 53      |
| 4. | Ether                  | ( ( TITLE-ABS-KEY ( "dispersive liquid-liquid microextraction" ) OR TITLE-ABS-KEY ( dllme ) ) AND ABS ( "ether" ) AND ABS ( extract* ) ) AND NOT TITLE-ABS-KEY ( "ionic liquid" ) AND NOT TITLE-ABS-KEY ( eutectic ) AND NOT ( determination W/5 ether ) AND ( LIMIT-TO ( DOCTYPE , "ar" ) )                                                                                  | 8       |
| 5. | Ketone                 | ( ( TITLE-ABS-KEY ( "dispersive liquid-liquid microextraction" ) OR TITLE-ABS-KEY ( dllme ) ) AND ABS ( "ketone" ) AND ABS ( extract* ) ) AND NOT TITLE-ABS-KEY ( "ionic liquid" ) AND NOT TITLE-ABS-KEY ( eutectic ) AND NOT ( determination W/5 ketone ) AND ( LIMIT-TO ( DOCTYPE , "ar" ) )                                                                                | 5       |
| 6. | Carbon disulfide       | ( ( TITLE-ABS-KEY ( "dispersive liquid-liquid microextraction" ) OR TITLE-ABS-KEY ( dllme ) ) AND ( ABS ( "carbon disulfide" ) OR ABS ( "carbon disulphide" ) ) AND ABS ( extract* ) ) AND NOT TITLE-ABS-KEY ( "ionic liquid" ) AND NOT TITLE-ABS-KEY ( eutectic ) AND ( LIMIT-TO ( DOCTYPE , "ar" ) )                                                                        | 5       |
| 7. | Toluene                | ( ( TITLE-ABS-KEY ( "dispersive liquid-liquid microextraction" ) OR TITLE-ABS-KEY ( dllme ) ) AND ( ABS ( toluene W/10 extract* ) OR ABS ( methylbenzene W/10 extract* ) ) AND NOT TITLE-ABS-KEY ( "ionic liquid" ) AND NOT TITLE-ABS-KEY ( eutectic ) AND NOT ABS ( toluene W/6 determination ) ) AND ( LIMIT-TO ( DOCTYPE , "ar" ) )                                        | 46      |
| 8. | xylene                 | ( ( TITLE-ABS-KEY ( "dispersive liquid-liquid microextraction" ) OR TITLE-ABS-KEY ( dllme ) ) AND ( ABS ( xylene W/10 extract* ) OR ABS ( dimethylbenzene W/10 extract* ) OR ABS ( methyltoluene W/10 extract* ) ) AND NOT TITLE-ABS-KEY ( "ionic liquid" ) AND NOT TITLE-ABS-KEY ( eutectic ) AND NOT ABS ( xylene W/6 determination ) ) AND ( LIMIT-TO ( DOCTYPE , "ar" ) ) | 6       |
| 9. | Brominated solvents    | ( ( TITLE-ABS-KEY ( "dispersive liquid-liquid microextraction" ) OR TITLE-ABS-KEY ( dllme ) ) AND ( ABS ( *bromo* W/8 extract* ) ) AND NOT TITLE-ABS-KEY ( "ionic liquid" ) )                                                                                                                                                                                                 | 23      |

|  |  |                                                                                                                       |  |
|--|--|-----------------------------------------------------------------------------------------------------------------------|--|
|  |  | AND NOT TITLE-ABS-KEY ( eutectic ) AND NOT ABS ( *bromo* W/6 determination ) ) AND<br>( LIMIT-TO ( DOCTYPE , "ar" ) ) |  |
|--|--|-----------------------------------------------------------------------------------------------------------------------|--|

**Polymer**

( ( TITLE-ABS-KEY ( "dispersive liquid-liquid microextraction" ) OR TITLE-ABS-KEY ( dllme ) ) AND ( ABS ( poly\* ) ) AND ABS  
( extract\* ) AND NOT TITLE-ABS-KEY ( "ionic liquid" ) AND NOT TITLE-ABS-KEY ( "polycyclic" ) AND NOT TITLE-ABS-KEY  
( eutectic ) ) AND ( LIMIT-TO ( DOCTYPE , "ar" ) )
